# Supplementary material for: Influence of Area-Level Characteristics on the Suicide Rate in Korean Adolescents
Source: PubMed Central journal article supplement — Psychiatry Investig. 2019 Nov 6;16(11):800–7. doi: 10.30773/pi.2019.0025 (PMC6877454; doi:10.30773/pi.2019.0025), 2019-11-06
Supplement: pi-2019-0025-suppl.pdf [file pi-2019-0025-suppl.pdf]

**Supplementary Table 1.** Community variables of seven metropolitan cities and nine provinces in Korea from 2005 to 2015

|                                                   | M1     | M2     | M3     | M4     | M5    | M6     | M7     | P1     | P2     | P3     | P4     | P5     | P6     | P7     | P8     | P9     |
|---------------------------------------------------|--------|--------|--------|--------|-------|--------|--------|--------|--------|--------|--------|--------|--------|--------|--------|--------|
| Sex ratio (%)                                     | 97.67  | 97.68  | 99.56  | 102.10 | 99.02 | 101.07 | 108.15 | 102.34 | 102.15 | 102.01 | 103.95 | 97.58  | 97.58  | 100.53 | 103.06 | 100.44 |
| Population density (km <sup>2</sup> , ln)         | 9.72   | 8.42   | 7.94   | 7.89   | 7.99  | 7.94   | 6.95   | 7.04   | 4.49   | 5.33   | 5.48   | 5.41   | 4.99   | 4.94   | 5.72   | 5.72   |
| Aging index                                       | 68.87  | 84.87  | 64.99  | 52.59  | 49.91 | 50.64  | 38.58  | 49.05  | 98.23  | 83.33  | 93.98  | 100.53 | 126.69 | 110.15 | 72.70  | 74.60  |
| Population inflow (thousands)                     | -82.55 | -26.58 | -15.23 | 14.18  | -2.05 | -3.02  | 0.22   | 103.87 | -0.75  | 3.43   | 11.93  | -7.41  | -9.21  | -5.35  | 5.37   | 5.69   |
| Relative poverty rate (%)                         | 0.22   | 0.27   | 0.27   | 0.20   | 0.19  | 0.28   | 0.11   | 0.18   | 0.32   | 0.29   | 0.33   | 0.34   | 0.32   | 0.33   | 0.24   | 0.34   |
| GRDP per capita (million Won, ln)                 | 3.34   | 2.89   | 2.75   | 3.05   | 2.85  | 2.88   | 3.96   | 3.10   | 3.02   | 3.22   | 3.65   | 2.99   | 3.43   | 3.37   | 3.27   | 3.10   |
| Employment rate of those aged 15–64 (%)           | 64.37  | 60.97  | 62.56  | 64.15  | 61.05 | 62.07  | 61.59  | 64.35  | 62.77  | 64.68  | 67.15  | 62.89  | 67.20  | 66.98  | 64.41  | 70.41  |
| Social welfare expenditure, in % general accounts | 27.40  | 32.25  | 32.57  | 27.96  | 35.08 | 32.54  | 23.10  | 23.18  | 17.63  | 21.53  | 19.34  | 22.75  | 18.41  | 19.27  | 20.42  | 14.23  |
| Divorce rate of females (‰)                       | 5.10   | 5.16   | 4.90   | 6.73   | 5.25  | 5.32   | 5.59   | 6.12   | 5.25   | 5.24   | 5.09   | 4.75   | 4.22   | 4.31   | 5.16   | 5.69   |
| % of married foreign women in Korea (‰)           | 6.65   | 6.19   | 5.92   | 7.55   | 6.26  | 6.25   | 6.23   | 7.19   | 8.03   | 8.51   | 9.23   | 10.62  | 11.80  | 8.38   | 7.58   | 8.65   |
| Number of crimes per thousand                     | 35.70  | 38.19  | 38.66  | 34.96  | 43.42 | 32.98  | 36.38  | 33.83  | 38.25  | 35.57  | 34.03  | 31.85  | 35.14  | 35.56  | 36.43  | 47.61  |
| One-person household rate (%)                     | 24.54  | 23.12  | 22.03  | 20.63  | 23.63 | 24.99  | 20.79  | 20.26  | 27.60  | 26.27  | 26.37  | 26.01  | 27.98  | 27.85  | 24.67  | 25.09  |
| Number of psychiatrists per 100,000               | 51.16  | 48.11  | 39.07  | 26.93  | 39.73 | 42.76  | 24.91  | 33.67  | 39.05  | 40.69  | 38.29  | 39.32  | 38.85  | 41.98  | 40.87  | 33.03  |

M: metropolitan city, P: province
